# Supplementary material for: Social distancing and extremely preterm births in the initial COVID-19 pandemic period
Source: PubMed Central journal article supplement (PMC11226398; doi:10.1038/s41372-024-01898-3), 2024-02-22
Supplement: 41372_2024_1898_MOESM1_ESM.pdf [file 41372_2024_1898_MOESM1_ESM.pdf]

**Supplementary Table 1: Cross-Correlation of Social Distancing Index with Percent Change of EPLB, EPIS, and Gestational Age**

| Lag (Weeks)            | CC          | 95% CI             |
|------------------------|-------------|--------------------|
| <b>EPLB</b>            |             |                    |
| <b>0</b>               | <b>0.29</b> | <b>-0.12, 0.71</b> |
| 1                      | 0.21        | -0.21, 0.62        |
| 2                      | 0.08        | -0.34, 0.49        |
| 3                      | 0           | -0.42, 0.42        |
| 4                      | -0.02       | -0.44, 0.4         |
| 5                      | 0           | -0.42, 0.42        |
| <b>EPIS</b>            |             |                    |
| 0                      | 0.08        | -0.34, 0.50        |
| <b>1</b>               | <b>0.09</b> | <b>-0.32, 0.51</b> |
| 2                      | 0.01        | -0.41, 0.43        |
| 3                      | 0.01        | -0.41, 0.42        |
| 4                      | 0           | -0.41, 0.42        |
| 5                      | -0.03       | -0.45, 0.38        |
| <b>Gestational Age</b> |             |                    |
| <b>0</b>               | <b>0.49</b> | <b>0.07, 0.91</b>  |
| 1                      | 0.42        | 0.00, 0.84         |
| 2                      | 0.41        | -0.01, 0.83        |
| 3                      | 0.41        | -0.01, 0.82        |
| 4                      | 0.23        | -0.19, 0.64        |
| 5                      | 0.16        | -0.25, 0.58        |

**Supplementary Table 2: Distribution of Extremely Preterm Live Births and Intrapartum Stillbirths by Study Period\***

| Study Period | Reference Period  |                   |                |                |        |        | Pandemic Period   |                   |                |                |        |        |
|--------------|-------------------|-------------------|----------------|----------------|--------|--------|-------------------|-------------------|----------------|----------------|--------|--------|
| Week Number  | Total Live Births | Total Stillbirths | Number of EPLB | Number of EPIS | EPLB % | EPIS % | Total Live Births | Total Stillbirths | Number of EPLB | Number of EPIS | EPLB % | EPIS % |
| 9            | 3905              | 42                | 62             | 5              | 1.59%  | 0.13%  | 1975              | 20                | 33             | 2              | 1.67%  | 0.10%  |
| 10           | 3835              | 27                | 62             | 3              | 1.62%  | 0.08%  | 1941              | 13                | 21             | 1              | 1.08%  | 0.05%  |
| 11           | 4050              | 51                | 62             | 3              | 1.53%  | 0.07%  | 1909              | 10                | 33             | 3              | 1.73%  | 0.16%  |
| 12           | 3918              | 35                | 81             | 4              | 2.07%  | 0.10%  | 1941              | 15                | 18             | 2              | 0.93%  | 0.10%  |
| 13           | 3984              | 28                | 58             | 3              | 1.46%  | 0.07%  | 1922              | 15                | 40             | 0              | 2.08%  | 0.00%  |
| 14           | 3941              | 34                | 76             | 4              | 1.93%  | 0.10%  | 1914              | 17                | 26             | 0              | 1.36%  | 0.00%  |
| 15           | 3856              | 37                | 55             | 2              | 1.43%  | 0.05%  | 1881              | 24                | 32             | 0              | 1.70%  | 0.00%  |
| 16           | 3910              | 30                | 65             | 4              | 1.66%  | 0.10%  | 1924              | 15                | 26             | 2              | 1.35%  | 0.10%  |
| 17           | 3954              | 39                | 54             | 5              | 1.37%  | 0.13%  | 1967              | 19                | 27             | 2              | 1.37%  | 0.10%  |
| 18           | 3989              | 29                | 68             | 3              | 1.70%  | 0.07%  | 1933              | 22                | 35             | 1              | 1.81%  | 0.05%  |
| 19           | 3983              | 32                | 62             | 3              | 1.56%  | 0.07%  | 1895              | 17                | 34             | 1              | 1.79%  | 0.05%  |
| 20           | 4128              | 37                | 63             | 3              | 1.53%  | 0.07%  | 1980              | 21                | 35             | 2              | 1.77%  | 0.10%  |
| 21           | 3976              | 33                | 57             | 6              | 1.43%  | 0.15%  | 1906              | 11                | 23             | 1              | 1.21%  | 0.05%  |
| 22           | 4148              | 37                | 63             | 5              | 1.52%  | 0.12%  | 1974              | 18                | 31             | 0              | 1.57%  | 0.00%  |
| 23           | 4158              | 39                | 65             | 4              | 1.56%  | 0.10%  | 1985              | 16                | 35             | 1              | 1.76%  | 0.05%  |
| 24           | 4070              | 33                | 59             | 2              | 1.45%  | 0.05%  | 1927              | 18                | 25             | 0              | 1.30%  | 0.00%  |
| 25           | 4158              | 30                | 78             | 3              | 1.88%  | 0.07%  | 1961              | 21                | 29             | 2              | 1.48%  | 0.10%  |
| 26           | 3932              | 31                | 69             | 2              | 1.75%  | 0.05%  | 1990              | 11                | 26             | 0              | 1.31%  | 0.00%  |
| 27           | 4239              | 39                | 59             | 4              | 1.39%  | 0.09%  | 2182              | 13                | 24             | 0              | 1.10%  | 0.00%  |
| 28           | 4104              | 36                | 78             | 1              | 1.90%  | 0.02%  | 2125              | 12                | 27             | 3              | 1.27%  | 0.14%  |
| 29           | 4197              | 37                | 55             | 2              | 1.31%  | 0.05%  | 2056              | 16                | 28             | 0              | 1.36%  | 0.00%  |
| 30           | 4216              | 22                | 54             | 1              | 1.28%  | 0.02%  | 2132              | 12                | 23             | 2              | 1.08%  | 0.09%  |

\*Births in the Neonatal Research Network Hospitals. Reference period= calendar weeks 9 to 30 of 2018 and 2019, pandemic period=calendar weeks 9 to 30 of 2020, EPLB= extremely preterm live births, and EPIS= extremely preterm stillbirths.
